# Supplementary material for: Analysis of Gender-Dependent Personal Protective Behaviors in a National Sample: Polish Adolescents’ COVID-19 Experience (PLACE-19) Study
Source: PubMed Central journal article supplement (PMC7459707; doi:10.3390/ijerph17165770), 2020-08-10
Supplement: ijerph-17-05770-s001.pdf [file ijerph-17-05770-s001.pdf]

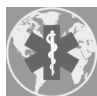

Article

# Analysis of Gender-Dependent Personal Protective Behaviors in a National Sample: Polish Adolescents' COVID-19 Experience (PLACE-19) Study

**Supplementary Table 1.** The questions on hand hygiene and personal protective behaviors knowledge and beliefs that were asked.

| Question                                                                                                                       | Answers to be chosen                                                                                                                                                                                                                                                                                                |
|--------------------------------------------------------------------------------------------------------------------------------|---------------------------------------------------------------------------------------------------------------------------------------------------------------------------------------------------------------------------------------------------------------------------------------------------------------------|
| Choice of method which in their opinion is better for proper hand hygiene and personal protection (ensuring better protection) | <input type="checkbox"/> Not leaving home<br><input type="checkbox"/> Using face mask<br><input type="checkbox"/> They are equally good<br><input type="checkbox"/> Do not know which one is better                                                                                                                 |
|                                                                                                                                | <input type="checkbox"/> Handwashing<br><input type="checkbox"/> Using gloves<br><input type="checkbox"/> They are equally good<br><input type="checkbox"/> Do not know                                                                                                                                             |
|                                                                                                                                | <input type="checkbox"/> Using soap<br><input type="checkbox"/> Using alcohol-based hand rub<br><input type="checkbox"/> They are equally good<br><input type="checkbox"/> Do not know                                                                                                                              |
|                                                                                                                                | <input type="checkbox"/> Using liquid soap<br><input type="checkbox"/> Using soap bar<br><input type="checkbox"/> They are equally good<br><input type="checkbox"/> Do not know                                                                                                                                     |
|                                                                                                                                | <input type="checkbox"/> Using paper towel<br><input type="checkbox"/> Using hand dryer<br><input type="checkbox"/> They are equally good<br><input type="checkbox"/> Do not know                                                                                                                                   |
| Required time of handwashing in their opinion (close-ended question)                                                           | <input type="checkbox"/> Less than 5 seconds<br><input type="checkbox"/> 5–10 seconds<br><input type="checkbox"/> 11–20 seconds<br><input type="checkbox"/> 21–40 seconds<br><input type="checkbox"/> More than 40 seconds<br><input type="checkbox"/> Time does not matter<br><input type="checkbox"/> Do not know |

**Supplementary Table 2.** The questions on actual hand hygiene and personal protective behaviors that were asked.

| Question                                                    | Answers to be chosen                                                                                                                                                                                                                                                                                                                                                                                                                                                                                                               |
|-------------------------------------------------------------|------------------------------------------------------------------------------------------------------------------------------------------------------------------------------------------------------------------------------------------------------------------------------------------------------------------------------------------------------------------------------------------------------------------------------------------------------------------------------------------------------------------------------------|
| Personal protective behaviors (multiple-choice question)*   | <input type="checkbox"/> Not leaving home<br><input type="checkbox"/> Using face mask<br><input type="checkbox"/> Not touching face<br><input type="checkbox"/> Using gloves<br><input type="checkbox"/> Handwashing<br><input type="checkbox"/> Using alcohol-based hand rub<br><input type="checkbox"/> Avoiding contact with those who may be sick<br><input type="checkbox"/> Avoiding public places<br><input type="checkbox"/> Taking medications or dietary supplements<br><input type="checkbox"/> Other                   |
| Frequency of washing hands (close-ended question) **        | <input type="checkbox"/> Not washing at all<br><input type="checkbox"/> 1–2 times a day<br><input type="checkbox"/> 3–5 times a day<br><input type="checkbox"/> 6–10 times a day<br><input type="checkbox"/> 11–15 times a day<br><input type="checkbox"/> 16–20 times a day<br><input type="checkbox"/> 21–30 times a day<br><input type="checkbox"/> More than 30 times a day                                                                                                                                                    |
| Reasons for not washing hands (multiple-choice question) ** | <input type="checkbox"/> In my opinion, there is no need to do it<br><input type="checkbox"/> I don't feel like doing it<br><input type="checkbox"/> I have no time to do it<br><input type="checkbox"/> I am forgetting about it<br><input type="checkbox"/> It is constricted (e.g., there is no soap, there is no bathroom nearby)<br><input type="checkbox"/> Due to side effects (e.g., skin problems due to frequent contact with soap)<br><input type="checkbox"/> Other<br><input type="checkbox"/> I always wash my hands |
| Circumstances of washing hands **                           | After coming back home<br><input type="checkbox"/> Never<br><input type="checkbox"/> Sometimes<br><input type="checkbox"/> Always                                                                                                                                                                                                                                                                                                                                                                                                  |
|                                                             | After handshaking<br><input type="checkbox"/> Never<br><input type="checkbox"/> Sometimes<br><input type="checkbox"/> Always                                                                                                                                                                                                                                                                                                                                                                                                       |
|                                                             | After using public transportation<br><input type="checkbox"/> Never<br><input type="checkbox"/> Sometimes<br><input type="checkbox"/> Always                                                                                                                                                                                                                                                                                                                                                                                       |
|                                                             | After money exchange<br><input type="checkbox"/> Never<br><input type="checkbox"/> Sometimes<br><input type="checkbox"/> Always                                                                                                                                                                                                                                                                                                                                                                                                    |
|                                                             | Before touching sick people<br><input type="checkbox"/> Never<br><input type="checkbox"/> Sometimes<br><input type="checkbox"/> Always                                                                                                                                                                                                                                                                                                                                                                                             |
|                                                             | After touching sick people<br><input type="checkbox"/> Never<br><input type="checkbox"/> Sometimes<br><input type="checkbox"/> Always                                                                                                                                                                                                                                                                                                                                                                                              |
|                                                             | After blowing nose<br><input type="checkbox"/> Never<br><input type="checkbox"/> Sometimes                                                                                                                                                                                                                                                                                                                                                                                                                                         |

| Question                               | Answers to be chosen                                                                                                                       |                                                                                                                                                                        |
|----------------------------------------|--------------------------------------------------------------------------------------------------------------------------------------------|------------------------------------------------------------------------------------------------------------------------------------------------------------------------|
| Procedure applied for washing hands ** | <input type="checkbox"/> Always<br><input type="checkbox"/> Never<br><input type="checkbox"/> Sometimes<br><input type="checkbox"/> Always |                                                                                                                                                                        |
|                                        | After sneezing                                                                                                                             | <input type="checkbox"/> Never<br><input type="checkbox"/> Sometimes<br><input type="checkbox"/> Always                                                                |
|                                        | After coughing                                                                                                                             | <input type="checkbox"/> Never<br><input type="checkbox"/> Sometimes<br><input type="checkbox"/> Always                                                                |
|                                        | Folding sleeves                                                                                                                            | <input type="checkbox"/> Never<br><input type="checkbox"/> Sometimes<br><input type="checkbox"/> Always<br><input type="checkbox"/> Not applicable                     |
|                                        | Removing watch and bracelets                                                                                                               | <input type="checkbox"/> Never<br><input type="checkbox"/> Sometimes<br><input type="checkbox"/> Always<br><input type="checkbox"/> Not applicable                     |
|                                        | Removing rings before or during handwashing                                                                                                | <input type="checkbox"/> Never<br><input type="checkbox"/> Sometimes<br><input type="checkbox"/> Always<br><input type="checkbox"/> Not applicable                     |
|                                        | Using soap                                                                                                                                 | <input type="checkbox"/> Never<br><input type="checkbox"/> Sometimes<br><input type="checkbox"/> Always                                                                |
|                                        | Using warm water                                                                                                                           | <input type="checkbox"/> Never<br><input type="checkbox"/> Sometimes<br><input type="checkbox"/> Always                                                                |
|                                        | Soaking hands before using soap                                                                                                            | <input type="checkbox"/> Never<br><input type="checkbox"/> Sometimes<br><input type="checkbox"/> Always<br><input type="checkbox"/> Not applicable (I do not use soap) |
|                                        | Spreading soap lather throughout the hands                                                                                                 | <input type="checkbox"/> Never<br><input type="checkbox"/> Sometimes<br><input type="checkbox"/> Always<br><input type="checkbox"/> Not applicable (I do not use soap) |
|                                        | Turning the faucet off with hand                                                                                                           | <input type="checkbox"/> Never<br><input type="checkbox"/> Sometimes<br><input type="checkbox"/> Always                                                                |
|                                        | Drying hands with towel                                                                                                                    | <input type="checkbox"/> Never<br><input type="checkbox"/> Sometimes<br><input type="checkbox"/> Always                                                                |

\* respondents were asked about them and their vulnerable relatives (e.g., elderly ones in their families);\*\* respondents were asked about period during the COVID-19 pandemic and before the COVID-19 pandemic.

**Supplementary Table 3.** Frequency of washing hands declared by the questioned sample of Polish secondary school students for the period before the COVID-19 issue and during the COVID-19 global pandemic.

| Declared frequency | Boys<br>(n = 814)   |                     | <i>p</i> * | Girls<br>(n = 1,509) |                     | <i>p</i> * |
|--------------------|---------------------|---------------------|------------|----------------------|---------------------|------------|
|                    | Before the COVID-19 | During the COVID-19 |            | Before the COVID-19  | During the COVID-19 |            |
| Not washing at all | 5 (0.6%)            | 0 (0.0%)            |            | 4 (0.3%)             | 0 (0.0%)            |            |
| 1–2 times          | 135 (16.6%)         | 26 (3.2%)           |            | 130 (8.6%)           | 19 (1.3%)           |            |
| 3–5 times          | 345 (42.4%)         | 174 (21.4%)         |            | 593 (39.3%)          | 196 (13.0%)         |            |
| 6–10 times         | 203 (24.9%)         | 308 (37.8%)         | < 0.0001   | 435 (28.8%)          | 524 (34.7%)         | < 0.0001   |
| 11–15 times        | 76 (9.3%)           | 163 (20.0%)         |            | 213 (14.1%)          | 362 (24.0%)         |            |
| 16–20 times        | 25 (3.1%)           | 68 (8.4%)           |            | 84 (5.6%)            | 222 (14.7%)         |            |
| 21–30 times        | 11 (1.4%)           | 44 (5.4%)           |            | 30 (2.0%)            | 119 (7.9%)          |            |
| > 30 times         | 14 (1.7%)           | 31 (3.8%)           |            | 20 (1.3%)            | 67 (4.4%)           |            |

\* chi<sup>2</sup> test.

**Supplementary Table 4.** Reasons for not washing hands declared by the questioned sample of Polish secondary school students for the period before the COVID-19 issue and during the COVID-19 global pandemic.

| Declared reasons                        | Boys<br>(n = 814)      |                        | <i>p</i> *** | Girls<br>(n = 1,509)   |                        | <i>p</i> *** |
|-----------------------------------------|------------------------|------------------------|--------------|------------------------|------------------------|--------------|
|                                         | Before the<br>COVID-19 | During the<br>COVID-19 |              | Before the<br>COVID-19 | During the<br>COVID-19 |              |
| In my opinion there is no need to do it | 159 (19.5%)            | 113 (13.9%)            |              | 178 (11.8%)            | 87 (5.8%)              |              |
| I don't feel like doing it              | 132 (16.2%)            | 67 (8.2%)              |              | 166 (11.0%)            | 54 (3.6%)              |              |
| I have no time to do it                 | 80 (9.8%)              | 37 (4.5%)              | 0.0001       | 86 (5.7%)              | 21 (1.4%)              | < 0.0001     |
| I am forgetting about it                | 281 (34.5%)            | 251 (30.8%)            |              | 480 (31.8%)            | 334 (22.1%)            |              |
| It is constricted                       | 36 (4.4%)              | 21 (2.6%)              |              | 112 (7.4%)             | 44 (2.9%)              |              |
| Due to side effects                     | 36 (4.4%)              | 42 (5.2%)              |              | 112 (7.4%)             | 114 (7.6%)             |              |
| Other *                                 | 3 (0.4%)               | 11 (1.4%)              |              | 12 (0.8)               | 18 (1.2%)              |              |
| Various reasons for not washing **      | 484 (40.5%)            | 374 (45.9%)            | < 0.0001     | 802 (53.1%)            | 480 (31.8%)            | < 0.0001     |
| I always wash my hands                  | 330 (40.5%)            | 440 (54.1%)            |              | 707 (46.9%)            | 1,029 (68.2%)          |              |

\* various not interpretable answers; \*\* number of respondents combined for various reasons declared;

\*\*\*  $\chi^2$  test.

**Supplementary Table 5.** Circumstances of washing hands, associated with socializing and being exposed to contact with other people, declared by the questioned sample of Polish secondary school students, based on Handwashing Habits Questionnaire [56] for the period before the COVID-19 issue and during the COVID-19 global pandemic.

| Characteristics                          | Boys<br>(n = 814)      |                        | <i>p</i> * | Girls<br>(n = 1,509)   |                        | <i>p</i> * |
|------------------------------------------|------------------------|------------------------|------------|------------------------|------------------------|------------|
|                                          | Before the<br>COVID-19 | During the<br>COVID-19 |            | Before the<br>COVID-19 | During the<br>COVID-19 |            |
| <b>After coming back home</b>            |                        |                        |            |                        |                        |            |
| Never                                    | 48 (7.5%)              | 10 (1.2%)              |            | 38 (2.5%)              | 6 (0.4%)               |            |
| Sometimes                                | 260 (31.0%)            | 113 (13.9%)            | < 0.0001   | 429 (28.4%)            | 101 (6.7%)             | < 0.0001   |
| Always                                   | 506 (61.5%)            | 691 (84.9%)            |            | 1.042 (69.1%)          | 1.402 (92.9%)          |            |
| <b>After handshaking</b>                 |                        |                        |            |                        |                        |            |
| Never                                    | 301 (37.0%)            | 152 (18.7%)            |            | 565 (37.4%)            | 212 (14.0%)            |            |
| Sometimes                                | 366 (45.0%)            | 330 (40.5%)            | < 0.0001   | 657 (43.5%)            | 598 (39.6%)            | < 0.0001   |
| Always                                   | 147 (18.1%)            | 332 (40.8%)            |            | 287 (19.0%)            | 699 (46.3%)            |            |
| <b>After using public transportation</b> |                        |                        |            |                        |                        |            |
| Never                                    | 136 (16.7%)            | 67 (8.2%)              |            | 174 (11.5%)            | 57 (3.8%)              |            |
| Sometimes                                | 336 (41.3%)            | 164 (20.1%)            | < 0.0001   | 561 (37.2%)            | 173 (11.5%)            | < 0.0001   |
| Always                                   | 342 (42.0%)            | 583 (71.6%)            |            | 774 (51.3%)            | 1,279 (84.8%)          |            |
| <b>After money exchange</b>              |                        |                        |            |                        |                        |            |
| Never                                    | 311 (38.2%)            | 186 (22.9%)            |            | 484 (32.1%)            | 189 (12.5%)            |            |
| Sometimes                                | 310 (38.1%)            | 257 (31.6%)            | < 0.0001   | 566 (37.5%)            | 421 (27.9%)            | < 0.0001   |
| Always                                   | 193 (23.7%)            | 371 (45.6%)            |            | 459 (30.4%)            | 899 (59.6%)            |            |

\* chi<sup>2</sup> test.

**Supplementary Table 6.** Circumstances of washing hands, associated with health, declared by the questioned sample of Polish secondary school students, based on Handwashing Habits Questionnaire [56] for the period before the COVID-19 issue and during the COVID-19 global pandemic.

| Characteristics                    | Boys<br>(n = 814)      |                        | <i>p</i> * | Girls<br>(n = 1,509)   |                        | <i>p</i> * |
|------------------------------------|------------------------|------------------------|------------|------------------------|------------------------|------------|
|                                    | Before the<br>COVID-19 | During the<br>COVID-19 |            | Before the<br>COVID-19 | During the<br>COVID-19 |            |
| <b>Before touching sick people</b> |                        |                        |            |                        |                        |            |
| Never                              | 268 (32.9%)            | 222 (27.3%)            |            | 528 (35.0%)            | 356 (23.6%)            |            |
| Sometimes                          | 288 (35.4%)            | 228 (28.0%)            | < 0.0001   | 505 (33.5%)            | 464 (30.7%)            | < 0.0001   |
| Always                             | 258 (31.7%)            | 364 (44.7%)            |            | 476 (31.5%)            | 689 (45.7%)            |            |
| <b>After touching sick people</b>  |                        |                        |            |                        |                        |            |
| Never                              | 76 (9.3%)              | 43 (5.3%)              |            | 141 (9.3%)             | 49 (3.2%)              |            |
| Sometimes                          | 228 (28.0%)            | 100 (12.3%)            | < 0.0001   | 403 (26.7%)            | 157 (10.4%)            | < 0.0001   |
| Always                             | 510 (62.7%)            | 671 (82.4%)            |            | 965 (63.9%)            | 1,303 (86.3%)          |            |
| <b>After blowing nose</b>          |                        |                        |            |                        |                        |            |
| Never                              | 246 (30.2%)            | 168 (20.6%)            |            | 416 (27.6%)            | 244 (16.2%)            |            |
| Sometimes                          | 364 (44.7%)            | 369 (45.3%)            | < 0.0001   | 664 (44.0%)            | 634 (42.0%)            | < 0.0001   |
| Always                             | 204 (25.1%)            | 277 (34.0%)            |            | 429 (28.4%)            | 631 (41.8%)            |            |
| <b>After sneezing</b>              |                        |                        |            |                        |                        |            |
| Never                              | 200 (24.6%)            | 145 (17.8%)            |            | 394 (26.1%)            | 203 (13.5%)            |            |
| Sometimes                          | 391 (48.0%)            | 348 (42.8%)            | < 0.0001   | 657 (43.5%)            | 597 (39.5%)            | < 0.0001   |
| Always                             | 223 (27.4%)            | 321 (39.4%)            |            | 458 (30.4%)            | 709 (47.0%)            |            |
| <b>After coughing</b>              |                        |                        |            |                        |                        |            |
| Never                              | 235 (28.9%)            | 162 (19.9%)            |            | 458 (30.4%)            | 241 (16.0%)            |            |
| Sometimes                          | 376 (46.2%)            | 354 (43.5%)            | < 0.0001   | 633 (41.9%)            | 625 (41.4%)            | < 0.0001   |
| Always                             | 203 (24.9%)            | 298 (36.6%)            |            | 418 (27.7%)            | 643 (42.6%)            |            |

\* chi<sup>2</sup> test.

**Supplementary Table 7.** Procedure of handwashing declared by the questioned sample of Polish secondary school students for the period before the COVID-19 issue and during the COVID-19 global pandemic.

| Characteristics                                    | Boys<br>(n = 814)      |                        | <i>p</i> *** | Girls<br>(n = 1,509)   |                        | <i>p</i> *** |
|----------------------------------------------------|------------------------|------------------------|--------------|------------------------|------------------------|--------------|
|                                                    | Before the<br>COVID-19 | During the<br>COVID-19 |              | Before the<br>COVID-19 | During the<br>COVID-19 |              |
| <b>Folding sleeves</b>                             |                        |                        |              |                        |                        |              |
| Never                                              | 62 (7.6%)              | 37 (4.5%)              | 0.0095       | 92 (6.1%)              | 39 (2.6%)              | < 0.0001     |
| Sometimes                                          | 194 (23.8%)            | 166 (20.4%)            |              | 403 (26.7%)            | 314 (20.8%)            |              |
| Always                                             | 366 (45.0%)            | 388 (47.7%)            |              | 799 (52.9%)            | 855 (56.7%)            |              |
| Not applicable                                     | 192 (23.6%)            | 223 (27.4%)            |              | 215 (14.2%)            | 301 (19.9%)            |              |
| <b>Removing watch and bracelets</b>                |                        |                        |              |                        |                        |              |
| Never                                              | 87 (10.7%)             | 81 (10.0%)             | 0.6733       | 208 (13.8%)            | 190 (12.6%)            | < 0.0001     |
| Sometimes                                          | 134 (16.5%)            | 128 (15.7%)            |              | 316 (20.9%)            | 132 (8.7%)             |              |
| Always                                             | 130 (16.0%)            | 118 (14.5%)            |              | 191 (12.5%)            | 197 (13.1%)            |              |
| Not applicable                                     | 463 (56.9%)            | 487 (59.8%)            |              | 794 (52.6%)            | 990 (65.6%)            |              |
| <b>Removing rings before or during handwashing</b> |                        |                        |              |                        |                        |              |
| Never                                              | 31 (3.8%)              | 29 (3.6%)              | 0.2346       | 229 (15.2%)            | 190 (12.6%)            | 0.0411       |
| Sometimes                                          | 45 (5.5%)              | 34 (4.2%)              |              | 157 (10.4%)            | 132 (8.7%)             |              |
| Always                                             | 81 (10.0%)             | 64 (7.9%)              |              | 201 (13.3%)            | 197 (13.1%)            |              |
| Not applicable                                     | 657 (80.7%)            | 687 (84.4%)            |              | 922 (61.1%)            | 990 (65.6%)            |              |
| <b>Using soap</b>                                  |                        |                        |              |                        |                        |              |
| Never                                              | 10 (1.2%)              | 5 (0.6%)               | < 0.0001     | 7 (0.5%)               | 1 (0.1%)               | < 0.0001     |
| Sometimes                                          | 134 (16.5%)            | 48 (5.9%)              |              | 195 (12.9%)            | 70 (4.6%)              |              |
| Always                                             | 670 (82.3%)            | 761 (93.5%)            |              | 1,307 (86.6%)          | 1,438 (95.3%)          |              |
| <b>Using warm water</b>                            |                        |                        |              |                        |                        |              |
| Never                                              | 33 (4.1%)              | 28 (3.4%)              | 0.1276       | 28 (1.9%)              | 15 (1.0%)              | 0.0001       |
| Sometimes                                          | 314 (38.6%)            | 279 (34.3%)            |              | 596 (39.5%)            | 498 (33.0%)            |              |
| Always                                             | 467 (57.4%)            | 507 (62.3%)            |              | 885 (58.6%)            | 996 (66.0%)            |              |
| <b>Soaking hands before using soap</b>             |                        |                        |              |                        |                        |              |
| Never                                              | 79 (9.7%)              | 88 (10.8%)             | 0.0205       | 119 (7.9%)             | 113 (7.5%)             | 0.0030       |
| Sometimes                                          | 204 (25.1%)            | 156 (19.2%)            |              | 338 (22.4%)            | 259 (17.2%)            |              |
| Always                                             | 526 (64.6%)            | 568 (69.8%)            |              | 1,051 (69.6%)          | 1,136 (75.3%)          |              |
| Not applicable                                     | 5 (0.6%)               | 2 (0.2%)               |              | 1 (0.1%)               | 1 (0.1%)               |              |
| <b>Spreading soap lather throughout the hands</b>  |                        |                        |              |                        |                        |              |
| Never                                              | 74 (9.1%)              | 47 (5.8%)              | < 0.0001     | 142 (9.4%)             | 52 (3.4%)              | < 0.0001     |
| Sometimes                                          | 341 (41.9%)            | 286 (35.1%)            |              | 659 (43.7%)            | 510 (33.8%)            |              |
| Always                                             | 394 (48.4%)            | 480 (59.0%)            |              | 704 (46.7%)            | 947 (62.8%)            |              |
| Not applicable                                     | 5 (0.6%)               | 1 (0.1%)               |              | 4 (0.3%)               | 0 (0.0%)               |              |
| <b>Turning the faucet off with hand *</b>          |                        |                        |              |                        |                        |              |
| Never                                              | 89 (10.9%)             | 142 (17.4%)            | 0.0001       | 210 (13.9%)            | 363 (24.1%)            | < 0.0001     |
| Sometimes                                          | 198 (24.3%)            | 219 (26.9%)            |              | 388 (25.7%)            | 409 (27.1%)            |              |
| Always                                             | 527 (64.7%)            | 453 (55.7%)            |              | 911 (60.4%)            | 737 (48.8%)            |              |
| <b>Drying hands with towel</b>                     |                        |                        |              |                        |                        |              |
| Never                                              | 21 (2.6%)              | 13 (1.6%)              | 0.0008       | 56 (3.7%)              | 44 (2.9%)              | 0.0012       |
| Sometimes                                          | 166 (20.4%)            | 114 (14.0%)            |              | 335 (22.2%)            | 262 (17.4%)            |              |
| Always                                             | 627 (77.0%)            | 687 (84.4%)            |              | 1,118 (74.1%)          | 1,203 (79.7%)          |              |

\* including in the applied procedure was interpreted as incorrect, as the faucet should not be touched barehanded after washing hands; \*\* chi<sup>2</sup> test.
